# Supplementary material for: Nano-hydroxyapatite polymeric hydrogels for dye removal
Source: Royal Society of Chemistry journal article supplement (doi:10.1039/c8ra01887a), 2018-01-01
Supplement: c8ra01887a1.pdf [file c8ra01887a1.pdf]

**S1**

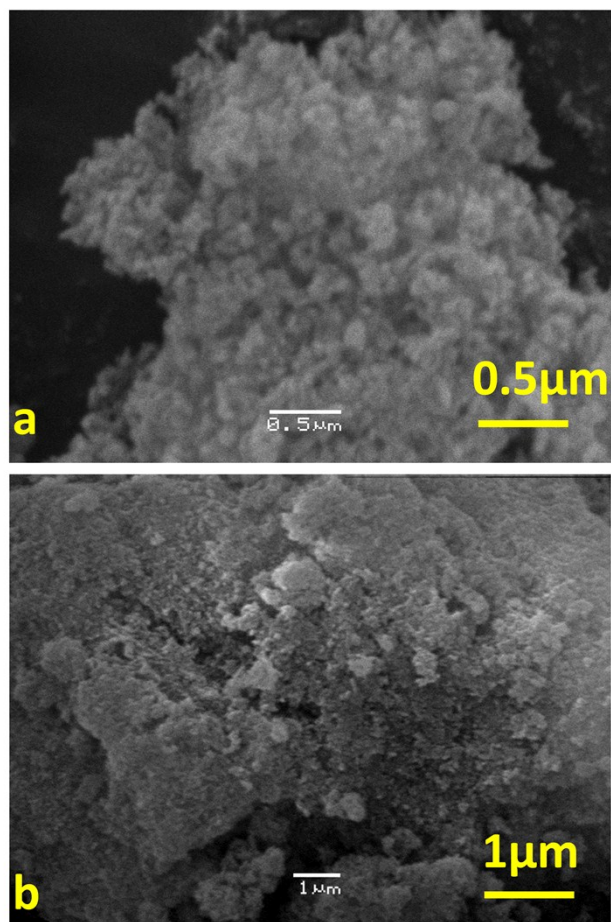

**Supplementary S1:** SEM images of a) nHA-MS, b) nHA-CS,

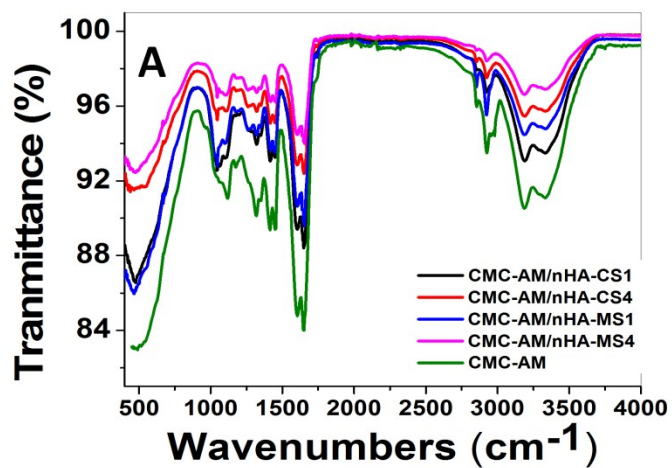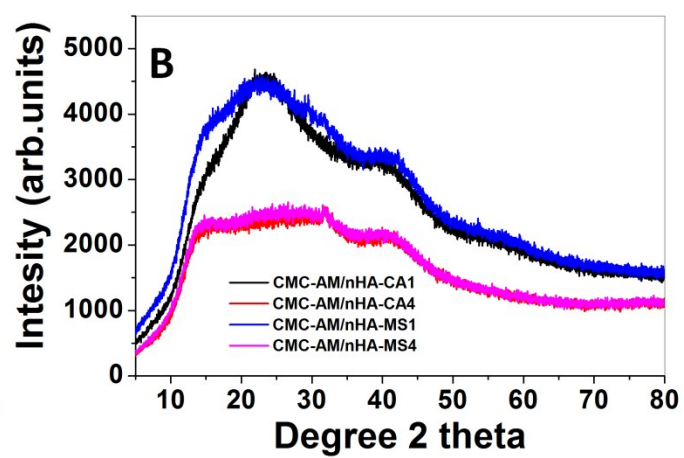

Supplementary S2: A) FTIR and B) of nHA based hydrogels
